# Supplementary material for: Antiviral efficacy of favipiravir against Zika and SARS-CoV-2 viruses in non-human primates
Source: Nat Commun. 2022 Aug 30;13:5108. doi: 10.1038/s41467-022-32565-w (PMC9427089; doi:10.1038/s41467-022-32565-w)
Supplement: Supplementary file 1 — Supplementary information [file 41467_2022_32565_MOESM1_ESM.pdf]

**Antiviral efficacy of favipiravir against Zika and SARS-CoV-2 viruses in  
non-human primates**

**Supplementary information**

## Supplementary Tables

**Supplementary Table I. Animal description**

| <b>GROUP Name</b>       | <b>Code</b> | <b>Sex</b> | <b>Date of Birth</b> |
|-------------------------|-------------|------------|----------------------|
| ZIKV CTRL               | MF1         | male       | 16/12/2013           |
| ZIKV CTRL               | MF3         | male       | 31/12/2012           |
| ZIKV CTRL               | MF5         | male       | 17/05/2013           |
| ZIKV CTRL               | MF6         | male       | 28/07/2013           |
| ZIKV CTRL               | MF7         | male       | 29/11/2013           |
| ZIKV CTRL               | MF8         | male       | 03/02/2014           |
| ZIKV 150mg/kg BID       | MF2         | male       | 12/01/2013           |
| ZIKV 150mg/kg BID       | MF9         | male       | 14/01/2014           |
| ZIKV 150mg/kg BID       | MF4         | male       | 27/01/2014           |
| ZIKV 150mg/kg BID       | MF10        | male       | 19/10/2013           |
| ZIKV 150mg/kg BID       | MF11        | male       | 15/01/2014           |
| ZIKV 150mg/kg BID       | MF12        | male       | 25/03/2014           |
| SARS-CoV-2 CTRL         | MF13        | female     | 10/05/2013           |
| SARS-CoV-2 CTRL         | MF14        | female     | 16/10/2013           |
| SARS-CoV-2 CTRL         | MF15        | female     | 30/10/2013           |
| SARS-CoV-2 CTRL         | MF16        | female     | 11/11/2013           |
| SARS-CoV-2 CTRL         | MF17        | female     | 03/02/2014           |
| SARS-CoV-2 CTRL         | MF28        | male       | 02/04/2017           |
| SARS-CoV-2 CTRL         | MF29        | female     | 16/04/2016           |
| SARS-CoV-2 CTRL         | MF30        | male       | 15/01/2015           |
| SARS-CoV-2 CTRL         | MF31        | female     | 21/03/2017           |
| SARS-CoV-2 CTRL         | MF32        | male       | 14/03/2017           |
| SARS-CoV-2 180mg/kg BID | MF18        | female     | 12/09/2013           |
| SARS-CoV-2 180mg/kg BID | MF19        | female     | 01/11/2013           |
| SARS-CoV-2 180mg/kg BID | MF20        | female     | 01/12/2013           |
| SARS-CoV-2 180mg/kg BID | MF21        | female     | 14/01/2014           |
| SARS-CoV-2 180mg/kg BID | MF22        | female     | 22/02/2014           |
| SARS-CoV-2 150mg/kg BID | MF23        | female     | 01/07/2013           |
| SARS-CoV-2 150mg/kg BID | MF24        | female     | 12/08/2013           |
| SARS-CoV-2 150mg/kg BID | MF25        | female     | 11/09/2013           |
| SARS-CoV-2 150mg/kg BID | MF26        | female     | 01/10/2013           |
| SARS-CoV-2 150mg/kg BID | MF27        | female     | 19/11/2013           |
| SARS-CoV-2 150mg/kg BID | MF38        | male       | 07/12/2016           |
| SARS-CoV-2 150mg/kg BID | MF39        | male       | 13/12/2016           |
| SARS-CoV-2 150mg/kg BID | MF40        | male       | 11/05/2016           |
| SARS-CoV-2 150mg/kg BID | MF41        | female     | 17/04/2016           |
| SARS-CoV-2 150mg/kg BID | MF42        | male       | 11/03/2017           |
| SARS-CoV-2 100mg/kg BID | MF33        | female     | 08/04/2016           |
| SARS-CoV-2 100mg/kg BID | MF34        | male       | 09/05/2016           |
| SARS-CoV-2 100mg/kg BID | MF35        | female     | 16/04/2016           |
| SARS-CoV-2 100mg/kg BID | MF36        | male       | 06/03/2017           |

|                         |      |      |            |
|-------------------------|------|------|------------|
| SARS-CoV-2 100mg/kg BID | MF37 | male | 09/03/2017 |
|-------------------------|------|------|------------|

**Supplementary Table II. Names and sequences of primers.**

| Name                   | Sequences (5'-3')                                |
|------------------------|--------------------------------------------------|
| RdRp gene / nCoV_IP4   |                                                  |
| nCoV_IP4-14059Fw       | GGTAACTGGTATGATTTCG                              |
| nCoV_IP4-14146Rv       | CTGGTCAAGGTTAATATAGG                             |
| nCoV_IP4-14084Probe(+) | TCATACAAACCACGCCAGG [5']Fam [3']BHQ-1            |
| E gene / ZIKV          |                                                  |
| ZIKE - F               | CCGCTGCCCCAACACAAG                               |
| ZIKE - R               | CCACTAACGTTCTTTTGACAGACAT                        |
| ZIKE – Probe           | AGCCTACCTTGACAAGCAATCAGACACTCAA[5']Fam [3']BHQ-1 |

## Supplementary figures

**Figure S1**

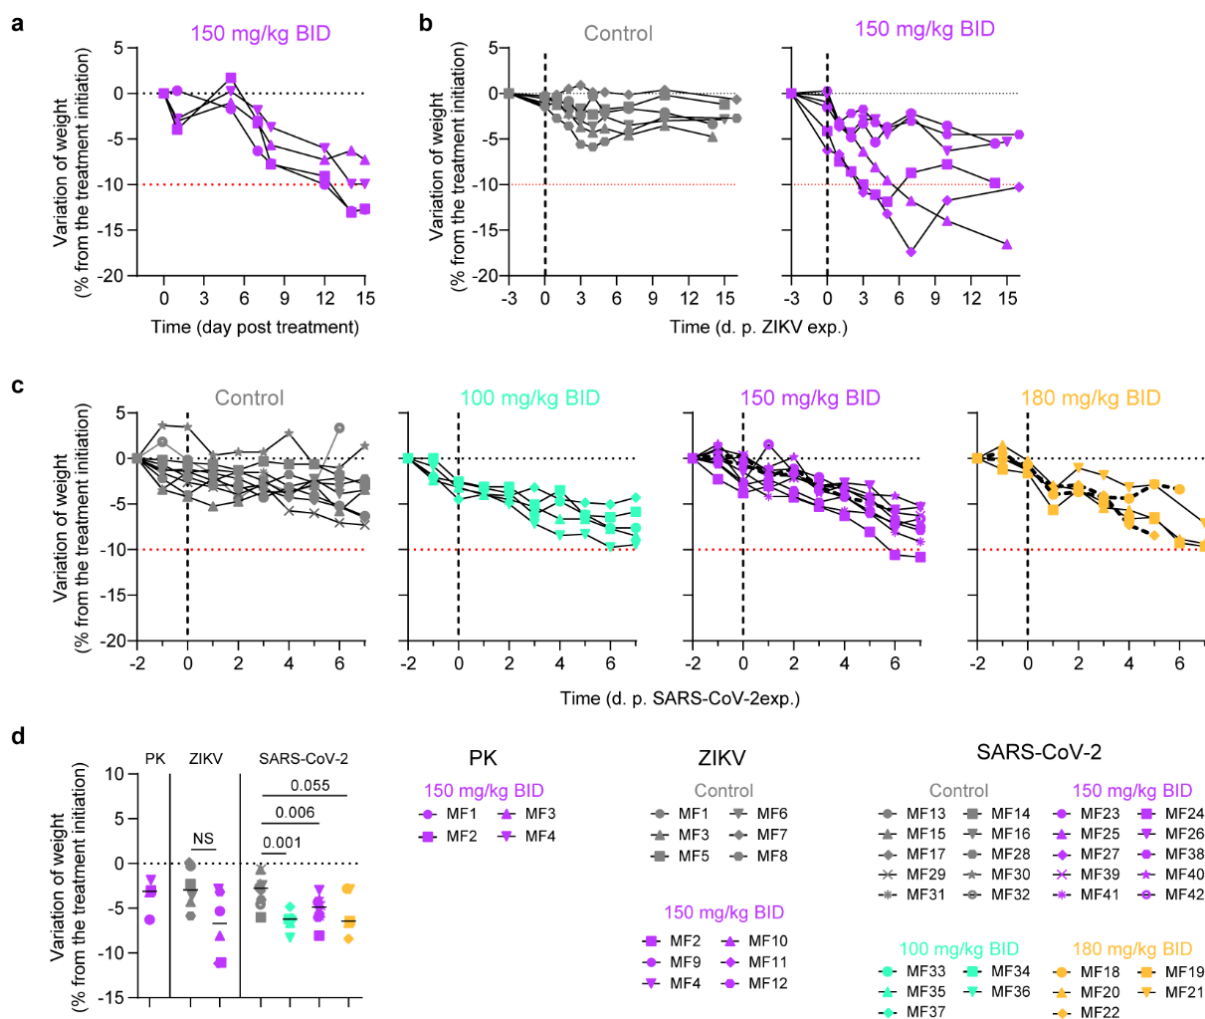

**Figure S1. Effect of FPV treatment on body weight.** Longitudinal evolution in body weight (relative to value at treatment initiation). a) uninfected animals; b) ZIKV infected animals; c) SARS-CoV-2 infected animals. d) all animals at 7 days post treatment initiation. Median value is indicated by horizontal bar. Grey: untreated; cyan: 100 mg/kg BID; purple: 150 mg/kg BID; yellow: 180 mg/kg BID. Groups were compared between groups using the two-tailed non-parametric Mann-Whitney test with no adjustment for multiple comparison. Source data are provided as a Source Data file.

**Figure S2**

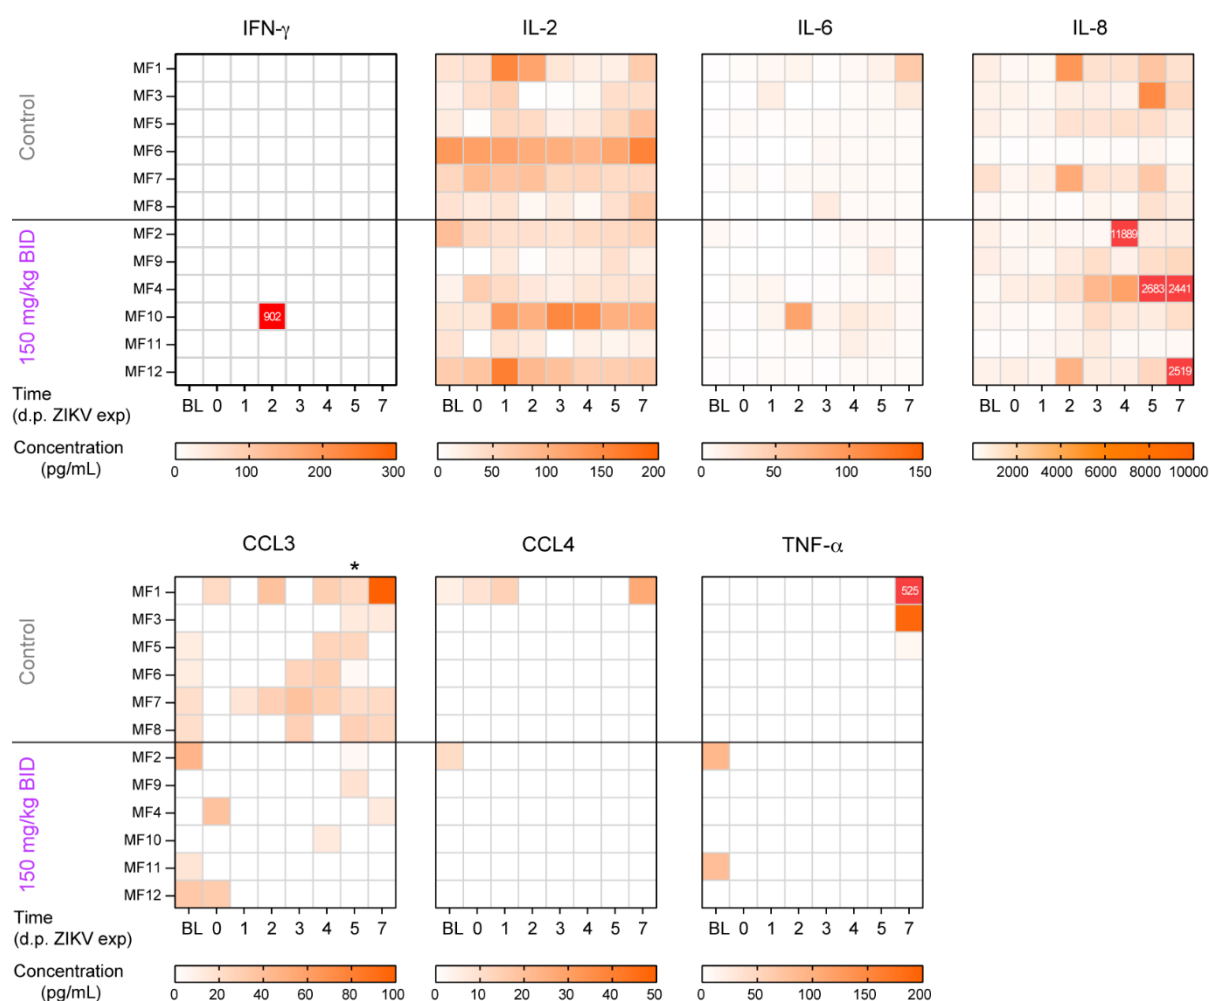

**Figure S2. Cytokines and chemokines in the plasma of ZIKV-exposed cynomolgus macaques treated with FPV.**

Heatmaps of the plasma concentrations of 7 cytokines and chemokines. Each column represents one cytokine or chemokine; the colour scale (in pg ml<sup>-1</sup>) is shown at the bottom. The asterisk indicates a significant difference in the concentration of CCL3 at 5 d.p.e. between the control group and the FPV group. Parameters were compared between groups using the two-tailed non-parametric Mann-Whitney test. Source data are provided as a Source Data file.

**Figure S3**

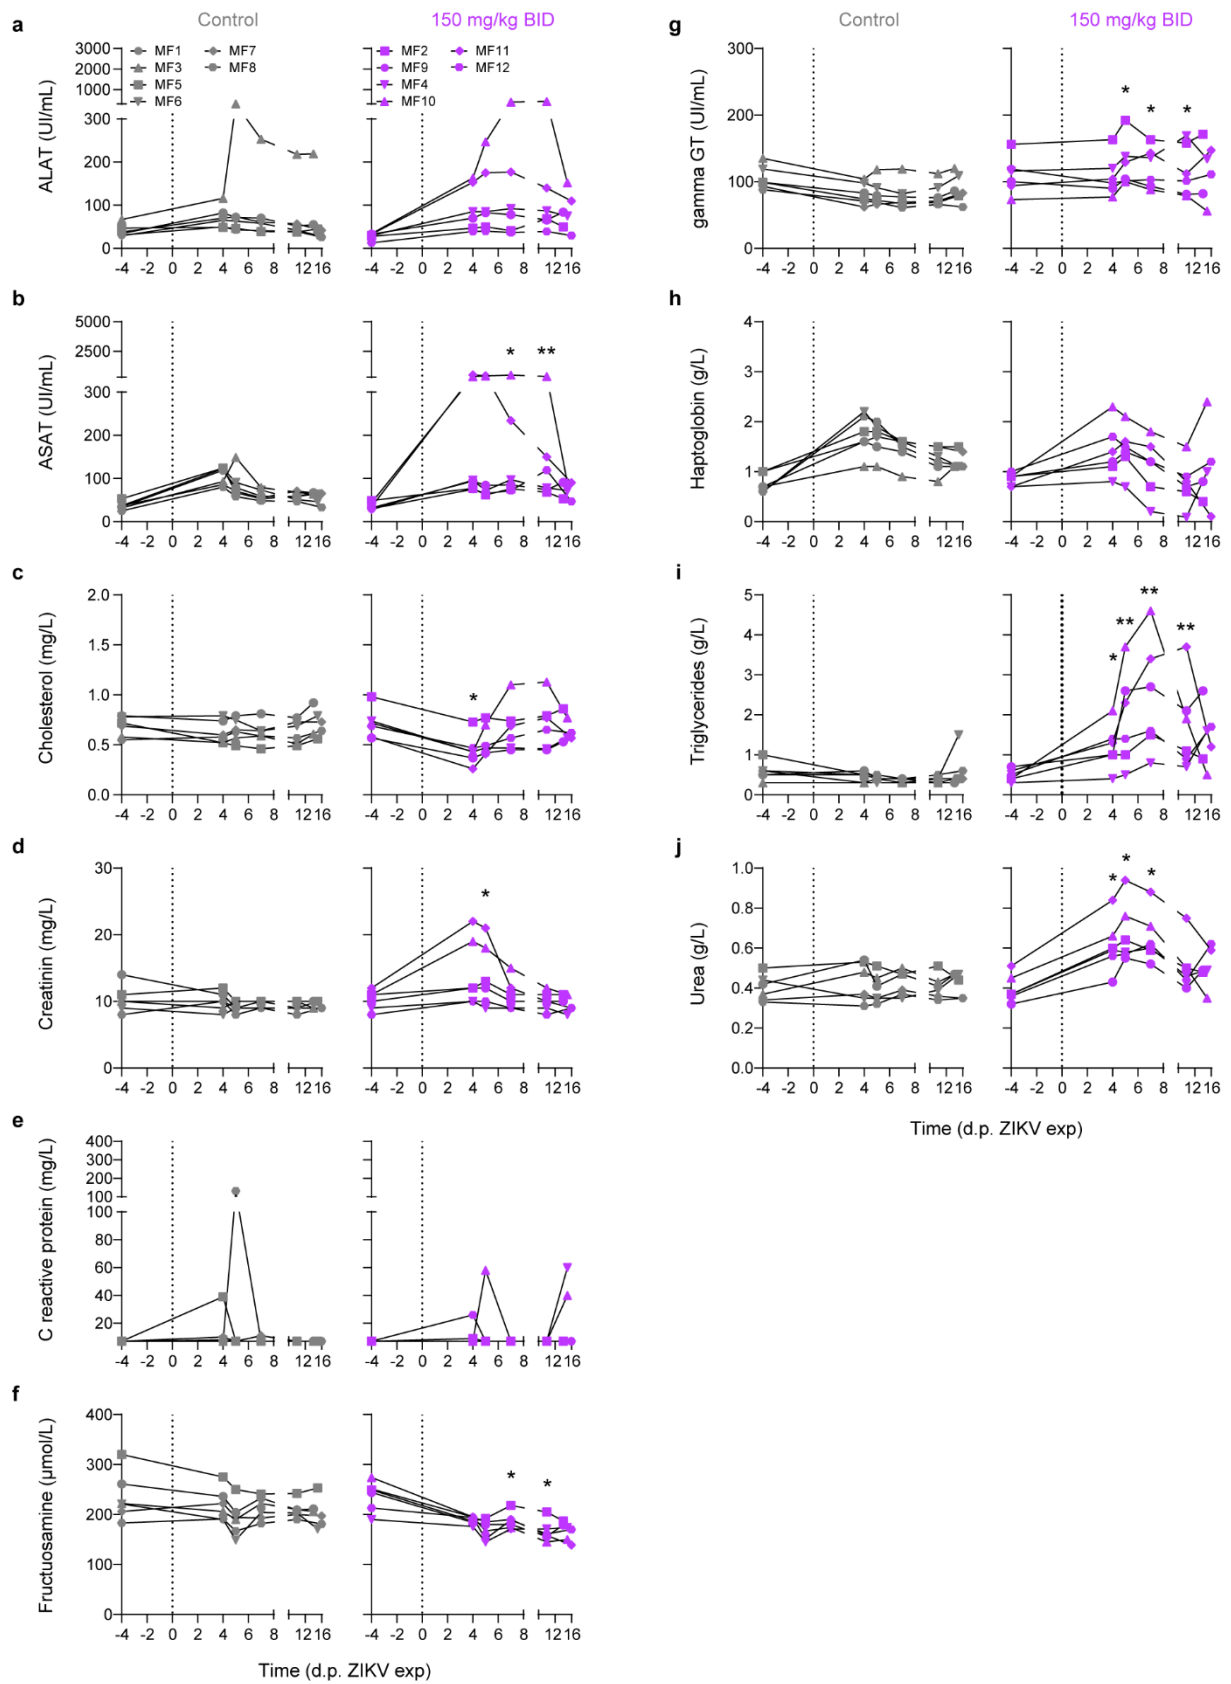

**Figure S3. Biochemistry analysis of cynomolgus macaques after ZIKV infection.**

a) ALAT, b) ASAT, c) cholesterol, d) creatinine, e) C reactive protein, f) fructosamine, g) gamma GT, h) haptoglobin, i) triglyceride and j) urea were analyzed in the plasma of all ZIKV infected animals. Grey: untreated; purple: 150 mg/kg BID. The asterisks indicate a significant difference between the control group and the FPV group. Parameters were compared between groups using the two-tailed non-parametric Mann-Whitney test. Source data are provided as a Source Data file.

Figure S4

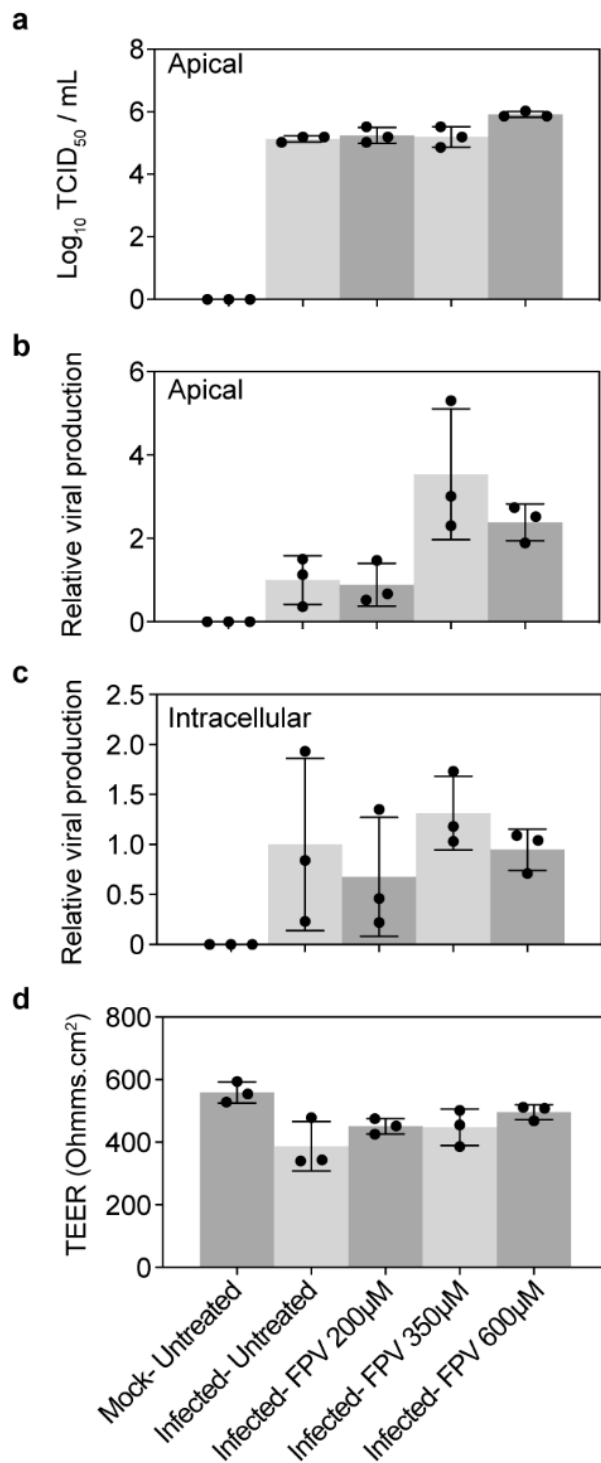

**Figure S4. In vitro evaluation of the antiviral activity of PFV against SARS-CoV-2.**

a) Infectious titers, b) apical and c) intracellular relative viral production and d) trans-epithelial resistance (TEER in Ohms.cm<sup>2</sup>) between the apical and basal poles in bronchial HAE at 48 h.p.i. MucilAir HAE reconstituted from human primary cells obtained from bronchial biopsies were provided

by Epithelix and maintained in air–liquid interphase. For infection experiments, apical poles were gently washed twice with warm OptiMEM medium and then infected directly with a 150- $\mu$ l dilution of virus in OptiMEM medium, at a MOI of 0.1. For mock infection, the same procedure was performed using OptiMEM as inoculum. Results are expressed in relative viral production compared with the infected untreated control. Epithelial integrity was assessed by measure of variations in transepithelial electrical resistance ( $\Delta$  TEER) and was expressed as Ohm.cm<sup>2</sup>. Data are presented as mean values  $\pm$  SD, n=3 biological replicates tested in duplicate.

**Figure S5**

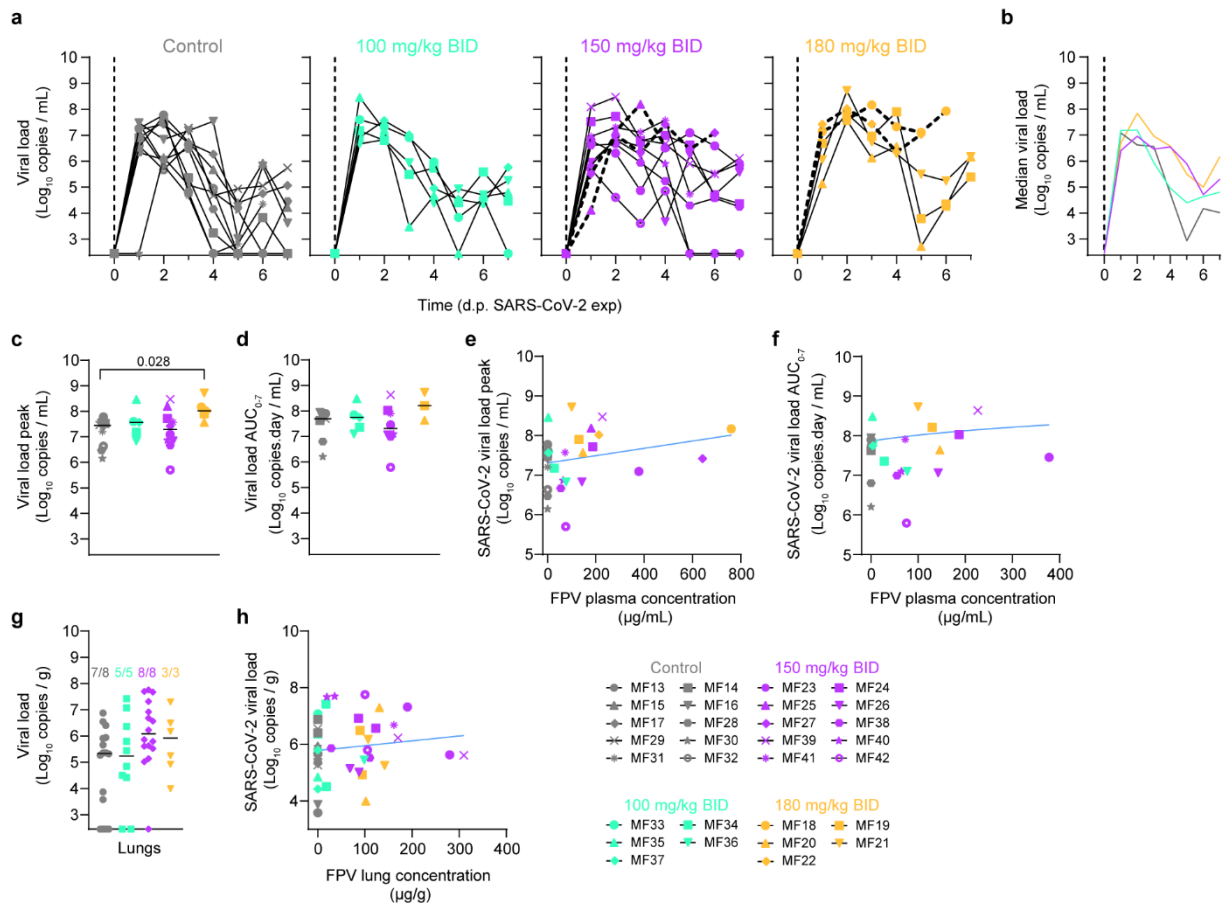

**Figure S5. Viral loads in the tracheal fluids of SARS-CoV-2-infected cynomolgus macaques treated with FPV.**

a) Individual tracheal viral loads determined by RT-PCR in all animals; b) Median tracheal viral load values observed in each treatment group; c and d) Viral kinetic parameters (peak and AUC viral load) during the first 7 days of infection. Median value is indicated by horizontal bar. Parameters were compared between groups using Kruskal-Wallis test following Dunn's multiple comparisons. e and f) Viral kinetic parameters (peak and AUC viral load between 0 and 7 dpi) according to geometric mean FPV plasma trough concentration. g) Viral load in lung biopsies sampled at euthanasia 7 d.p.e. The numbers indicated animals where viral load was detected in lung tissue. Median value is indicated by horizontal bar. h) Viral load in lung biopsies according to FPV lung concentration. A Spearman correlation test was performed to assess the association between drug concentration and viral kinetic parameters. Grey: untreated; cyan: 100 mg/kg BID; purple: 150 mg/kg BID; yellow: 180 mg/kg BID. Source data are provided as a Source Data file.

**Figure S6**

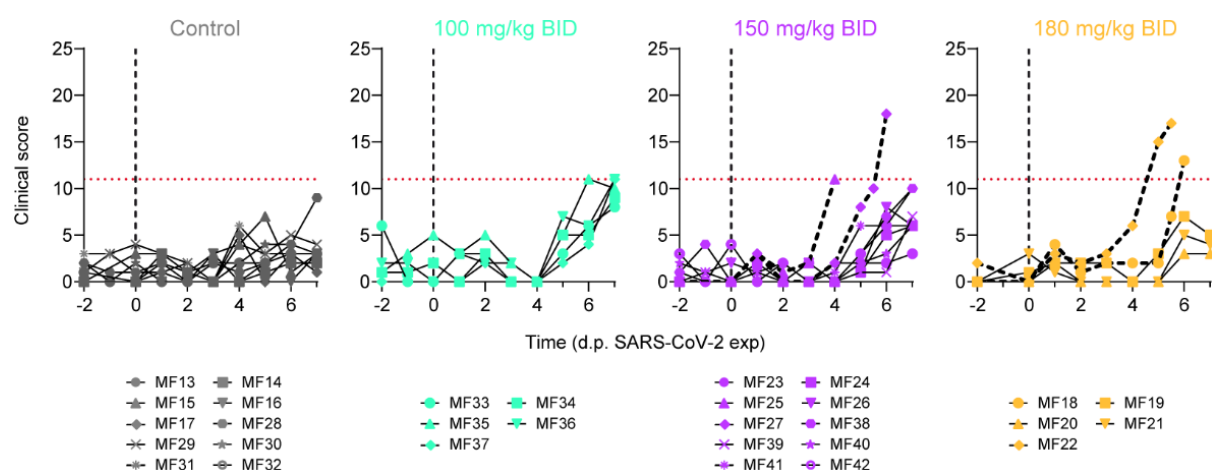

**Figure S6. Clinical scoring of SARS-CoV-2-exposed cynomolgus macaques.**

Clinical score was based on body weight evolution, rectal temperature, food/water consumption, activity, dehydration, respiration, heart rate and oxygen saturation. A score between 0 and 3 were allotted to each parameter. Sum of all recorded parameter were shown. Horizontal red dotted line indicated the human end point score. Source data are provided as a Source Data file.

**Figure S7**

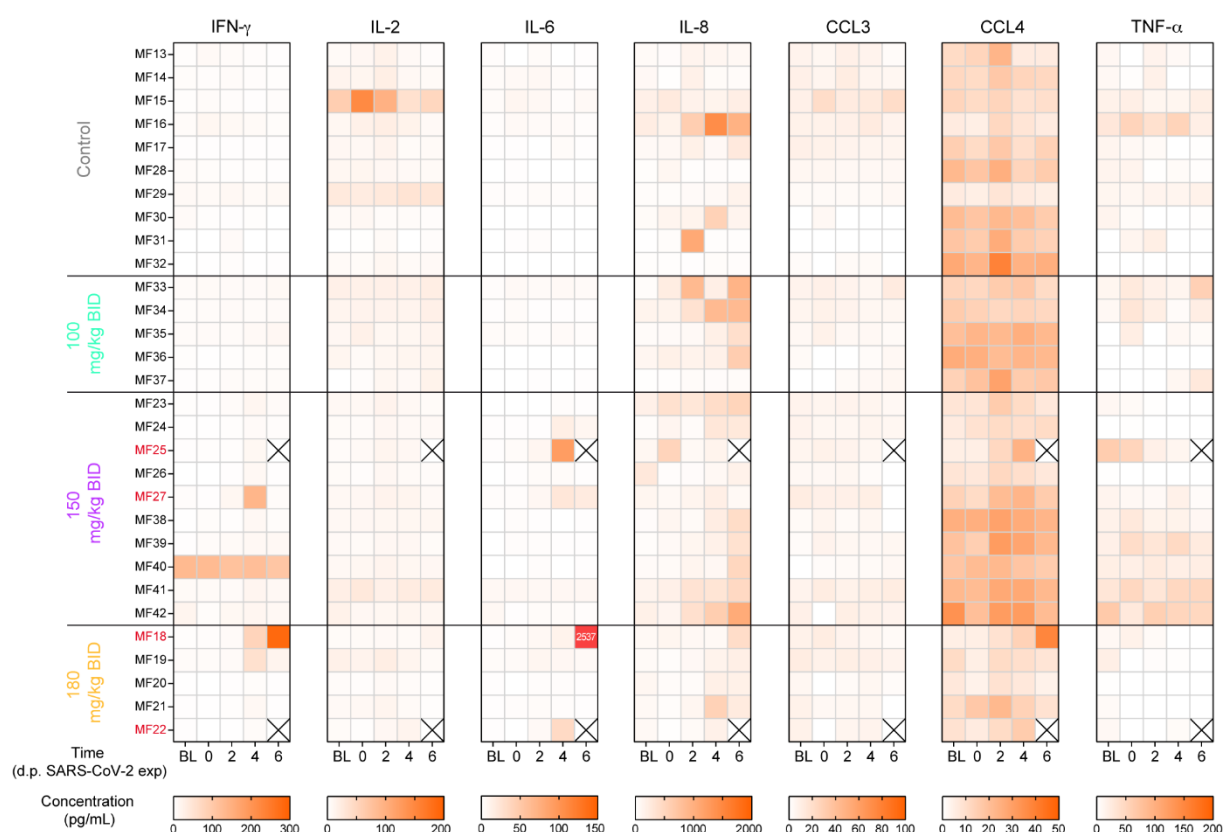

**Figure S7. Cytokines and chemokines in the plasma of SARS-CoV-2-exposed cynomolgus macaques treated with FPV.**

Heatmaps of the plasma concentrations of 7 cytokines and chemokines. Each column represents one cytokine or chemokine; the colour scale (in pg ml<sup>-1</sup>) is shown at the bottom. 'X' indicates that no measurement was feasible for this time point. Animals that were euthanized due to rapid deterioration of their clinical status were indicated in red. Source data are provided as a Source Data file.

Figure S8

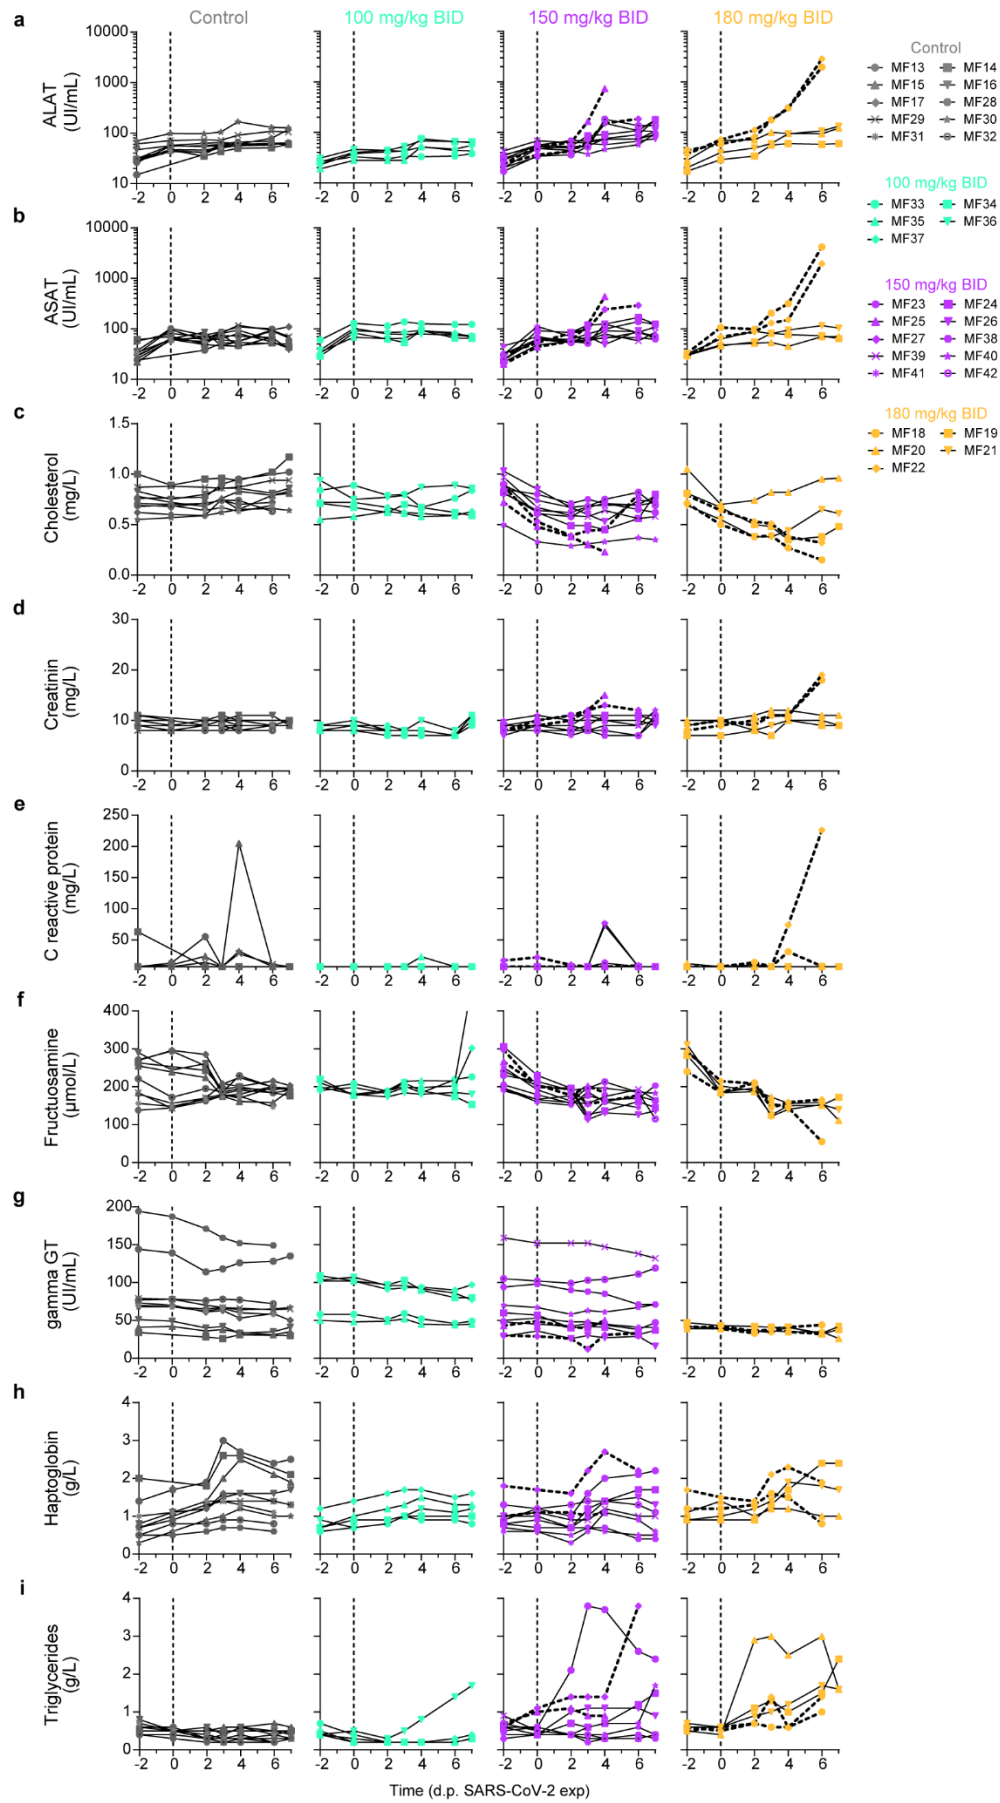

**Figure S8. Biochemistry analysis of cynomolgus macaques after SARS-CoV-2 infection.**

ALAT (a), ASAT (b), cholesterol (c), creatinine (d), C reactive protein (e), fructosamine (f), gamma GT (g), haptoglobin (h) and triglyceride (g) were analyzed in the plasma of all SARS-CoV-2 infected animals. Grey: untreated; cyan: 100 mg/kg BID; purple: 150 mg/kg BID; yellow: 180 mg/kg BID. Source data are provided as a Source Data file.

**Figure S9**

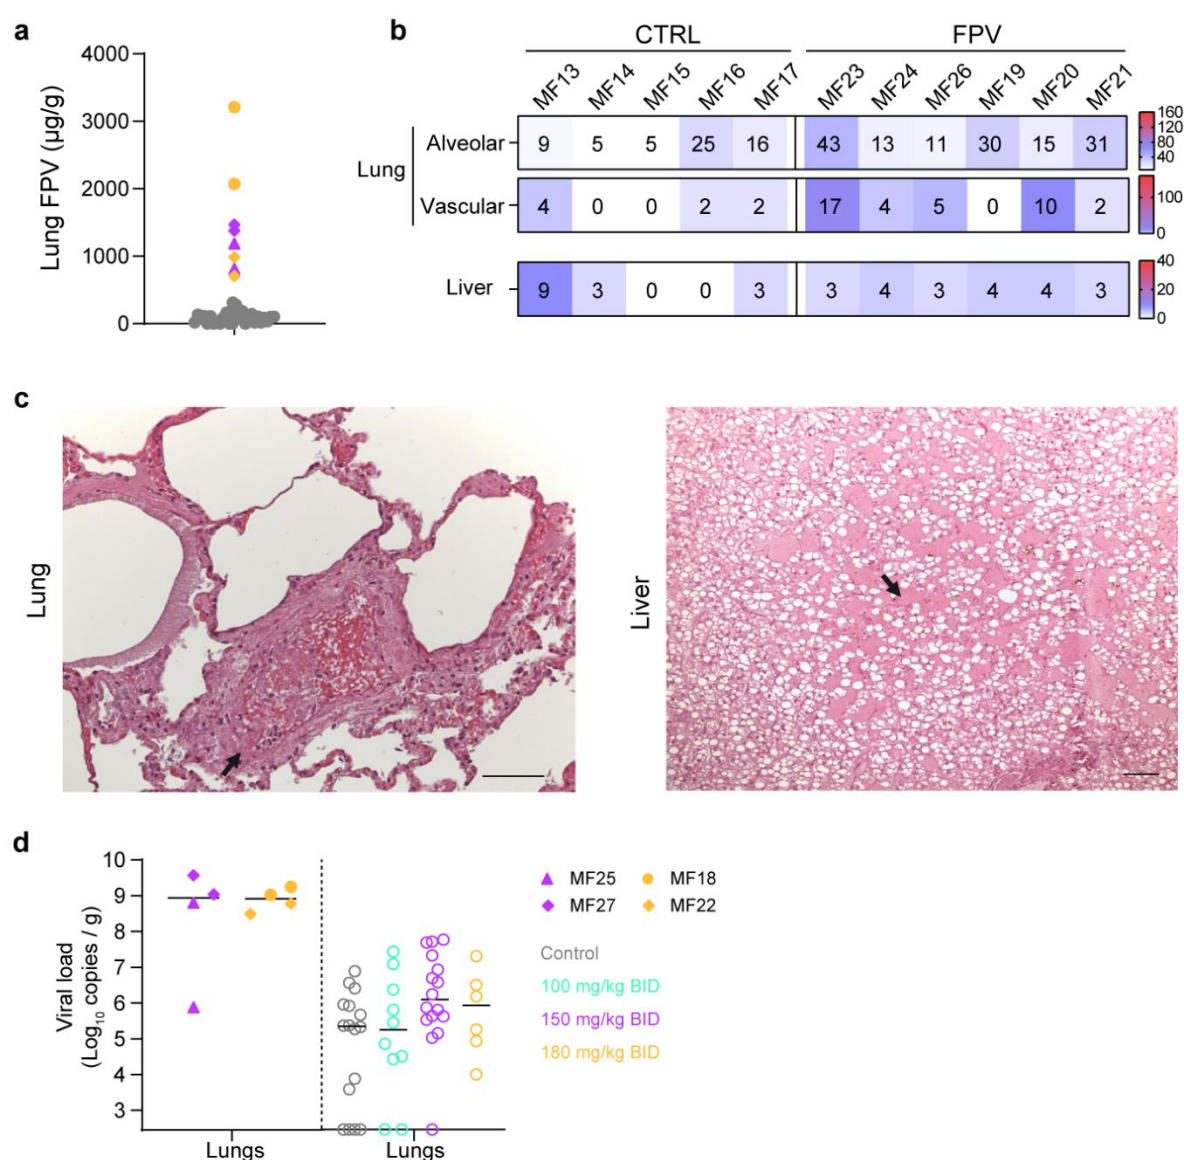

**Figure S9. Histological analysis of tissues from SARS-CoV-2-exposed cynomolgus macaques.**

a) FPV concentration in lung biopsies sampled at euthanasia. Two biopsies per animal were analyzed. Values for MF18, MF22, MF25 and MF27 are indicated in color according to the FPV dose (pink: 150 mg/kg BID and yellow: 180 mg/kg BID), and other FPV treated animals were indicated in grey. b) Tissue lesions and cell infiltrates were analyzed at necropsy at 7 dpe and histological score for lung (alveolar and vascular areas) and liver was showed in heatmap. c) Representative images of lung (left) and liver (right) of animals that were early euthanized. The black bars indicate 100µm. d) Viral load in lung biopsies sampled at euthanasia in MF18, MF22, MF25 and MF27 (left) and the rest of study's

NHPs (right). Two lung biopsies per animal were analyzed. Median value is indicated by horizontal bar.

Source data are provided as a Source Data file.

**Figure S10**

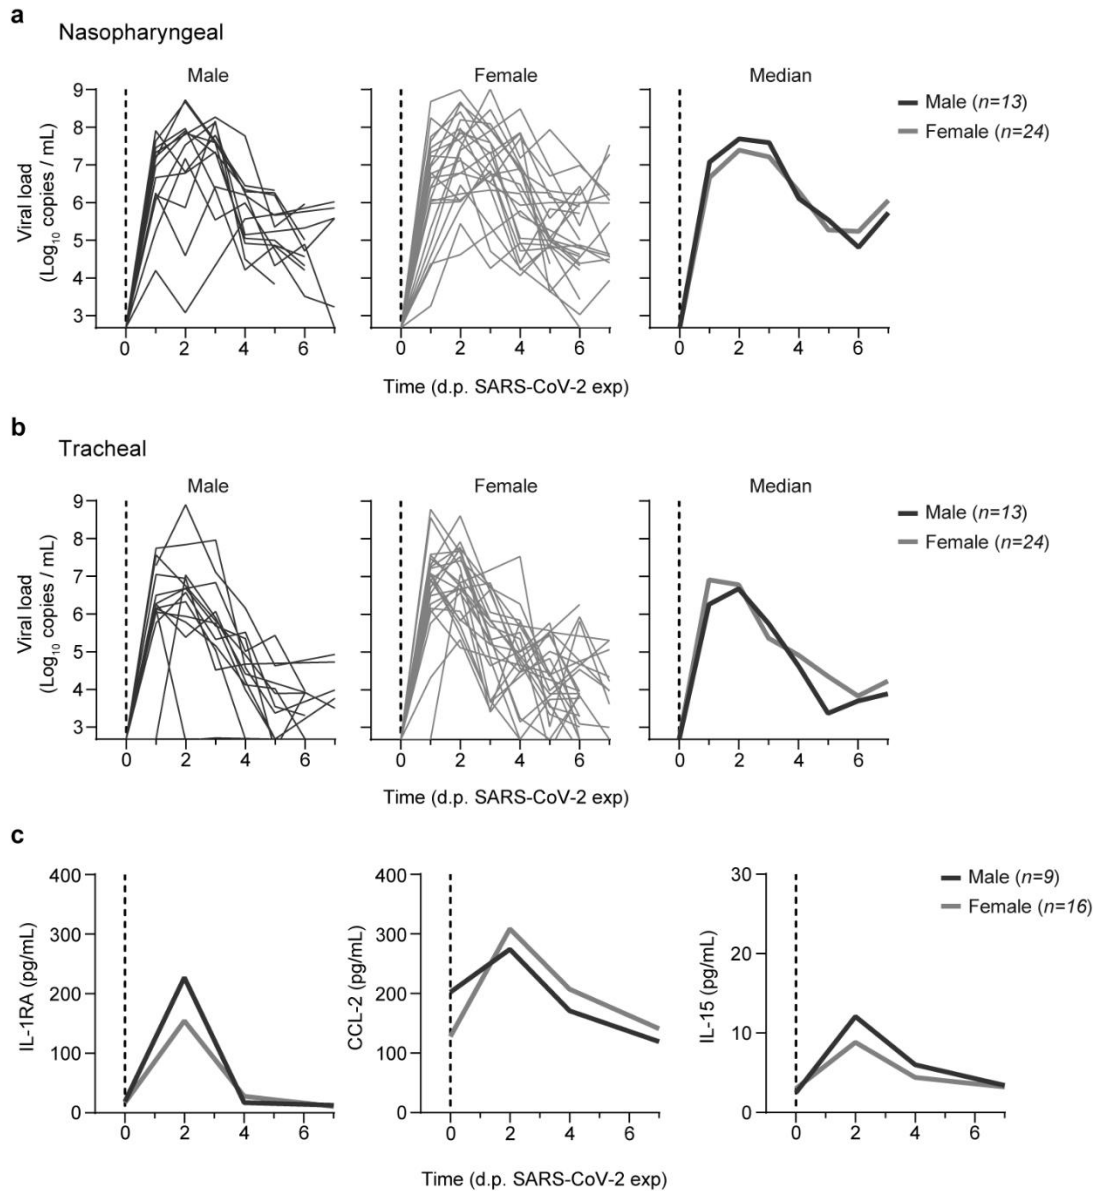

**Figure S10. Comparison of SARS-CoV-2 viral loads between male and female cynomolgus macaques.**

Individual nasopharyngeal (a) and tracheal (b) viral loads determined by RT-PCR in historical NHP exposed to  $10^6$  pfu of SARS-CoV-2 used as controls of therapeutic and vaccine trials (n=13 males and n=24 females). Median viral load values observed in male and female. Source data are provided as a Source Data file. c) Median plasma concentrations of IL1-RA, CCL-2 and IL-15 in historical male and female exposed to SARS-CoV-2.
